# Supplementary material for: Environmental Factors Drive Chalcid Body Size Increases with Altitudinal Gradients for Two Hyper-Diverse Taxa
Source: MDPI journal article supplement (doi:10.3390/insects14010067), 2023-01-10

**Table S1** Overview of the numbers of analyzed specimens in Pteromalidae and Eulophidae.

| Data sources                |                   | Pteromalidae |      | Eulophidae |      |
|-----------------------------|-------------------|--------------|------|------------|------|
|                             |                   | Female       | Male | Female     | Male |
| <b>From the field</b>       | Number            | 458          | 316  | 415        | 316  |
|                             | Altitudinal range | 277~4337 m   |      | 16~4237 m  |      |
|                             | Genera            | 24           |      | 23         |      |
|                             | Total             | 774          |      | 731        |      |
| <b>From the BOLD system</b> | Number            | 424          | 208  | 579        | 237  |
|                             | Altitudinal range | 4~2052 m     |      | -21~2028 m |      |
|                             | Genera            | 41           |      | 49         |      |
|                             | Total             | 632          |      | 816        |      |
| <b>SUM</b>                  |                   | 1406         |      | 1547       |      |

**Figure S1** The correlation between seven morphological characteristics of both sexes in Pteromalidae(a) and Eulophidae(b).

(a) Pteromalidae

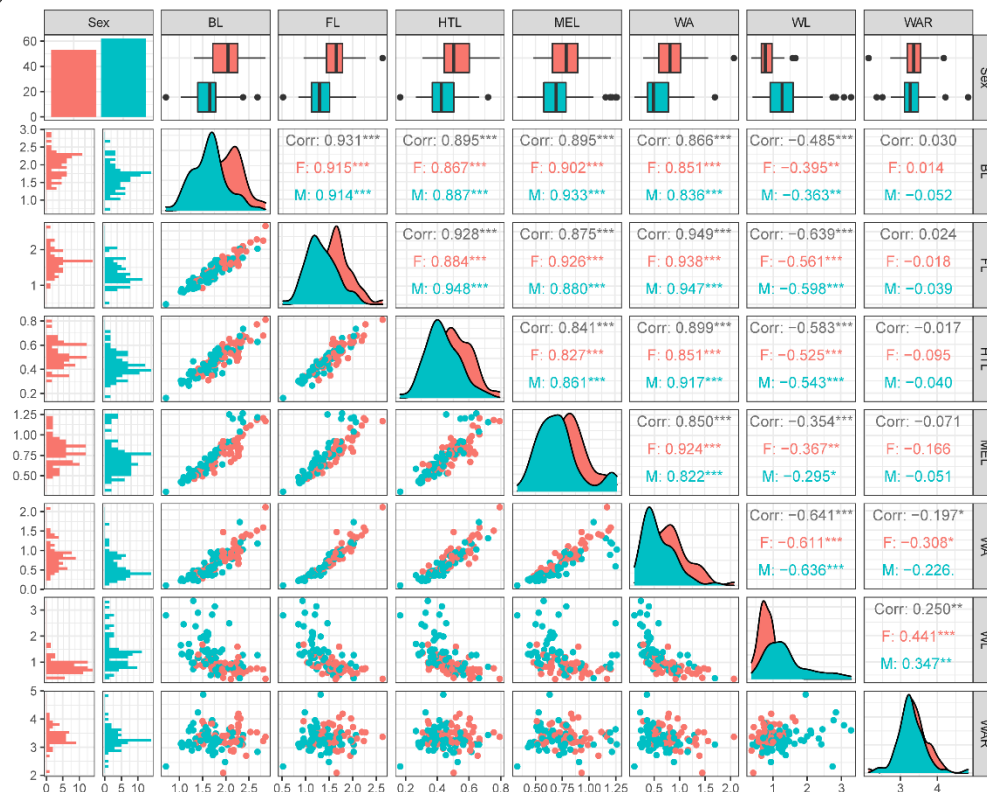

(b)Eulophidae

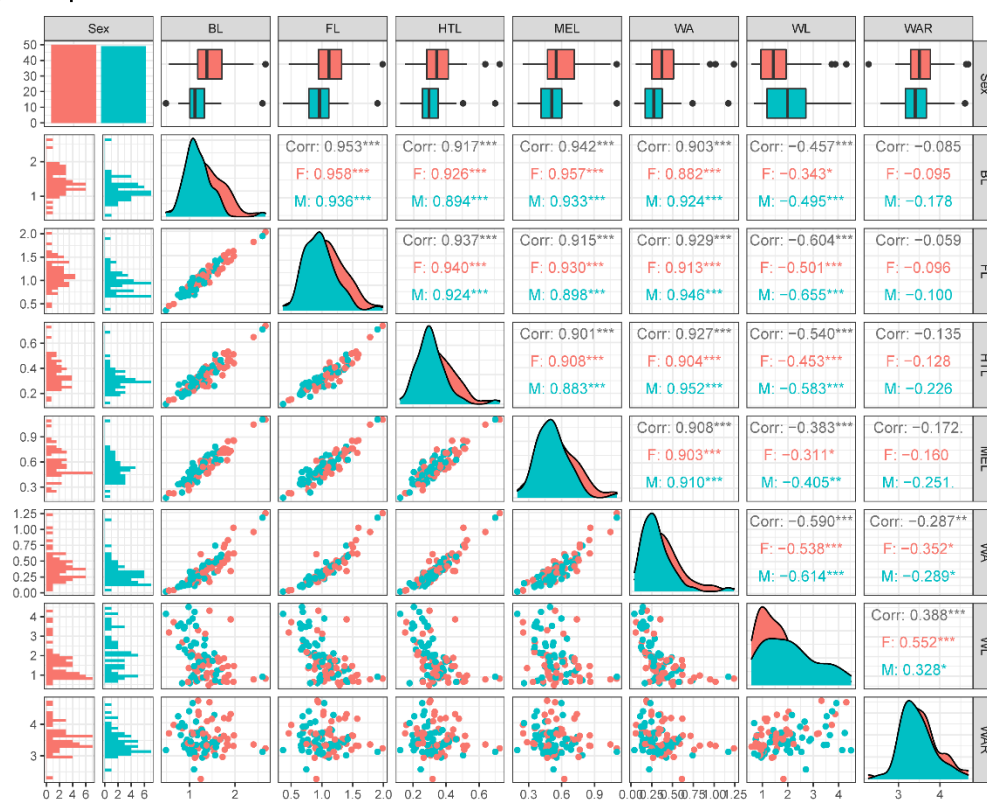

**Figure S2** Frequency distribution histogram of the FL of Pteromalidae(a) and Eulophidae(b) from all elevation gradients.

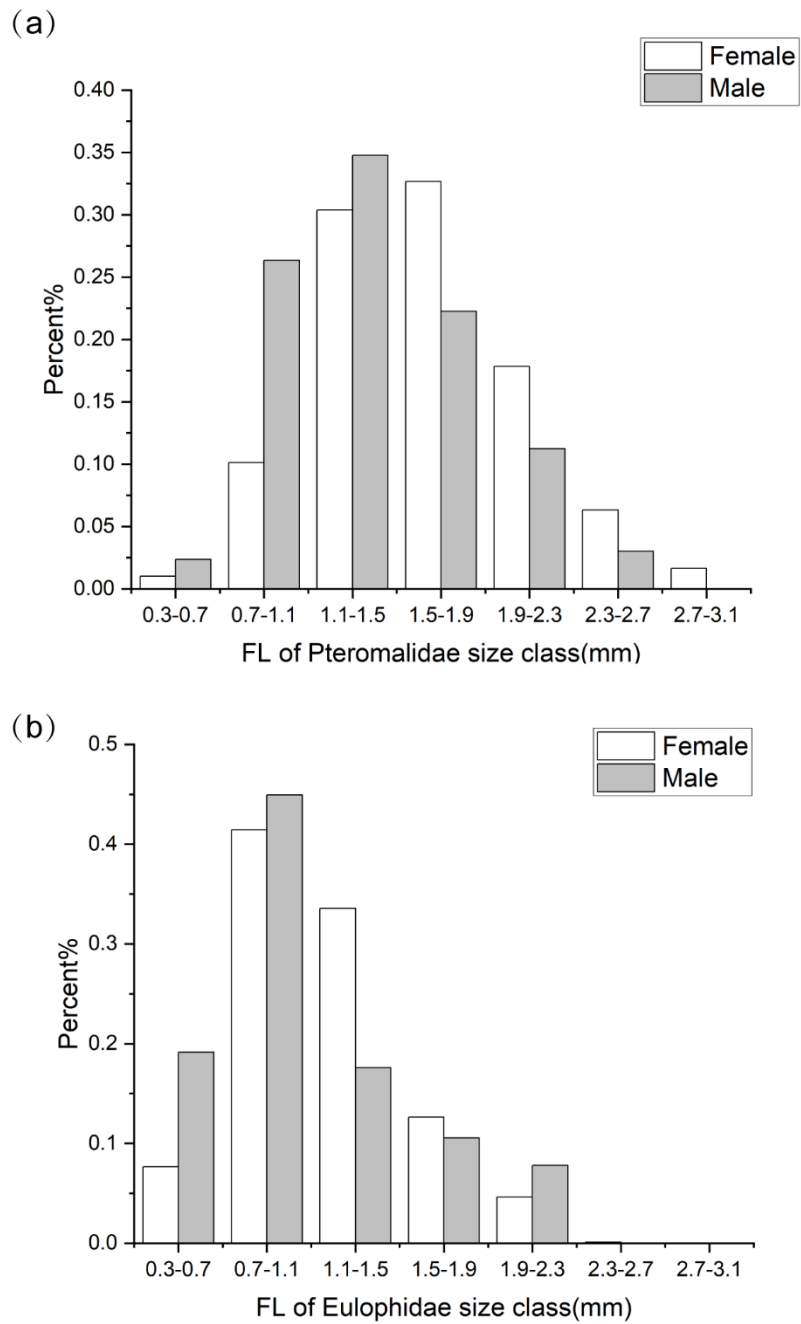

**Figure S3** Histogram of the FL of Pteromalidae(a,b) and Eulophidae(c,d) from four elevation ranges.

**(a) Female of Pteromalidae**

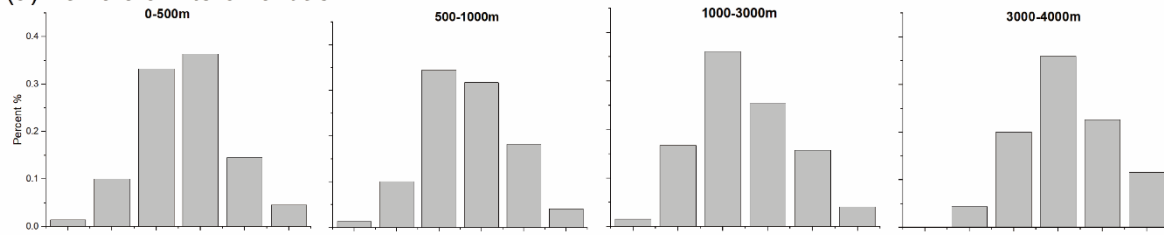

**(b) Male of Pteromalidae**

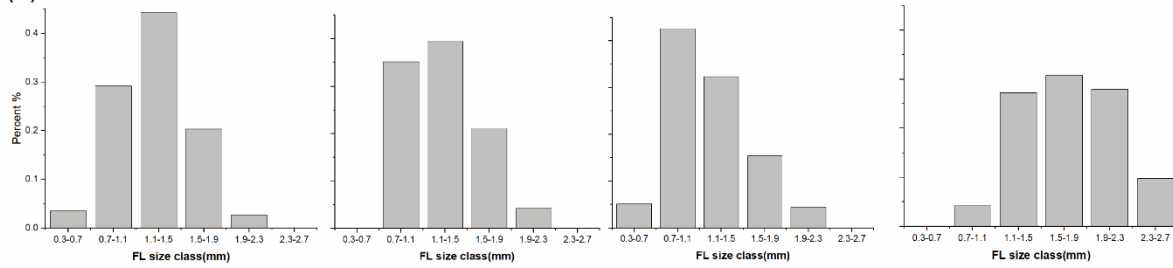

**(c) Female of Eulophidae**

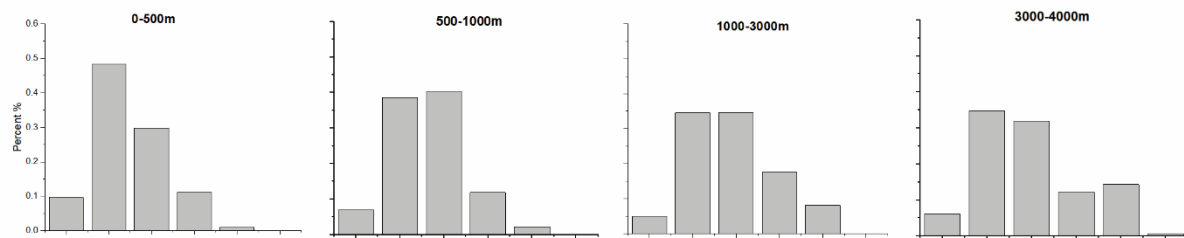

**(d) Male of Eulophidae**

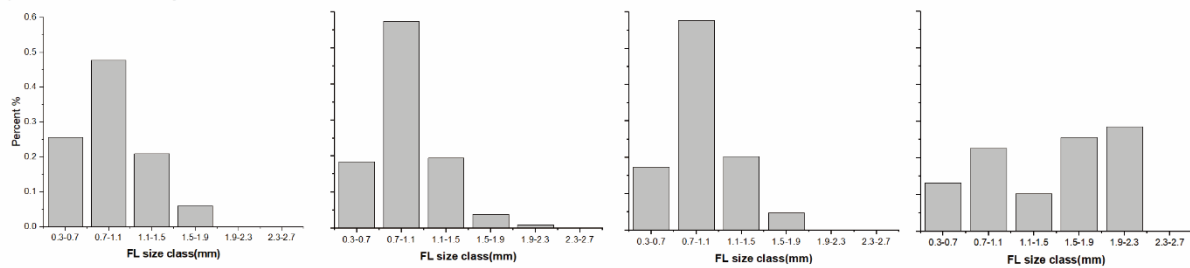

**Figure S4** The relationship between forewing length and elevation in six subfamilies from Pteromalidae (a–c) and Eulophidae (d–f).

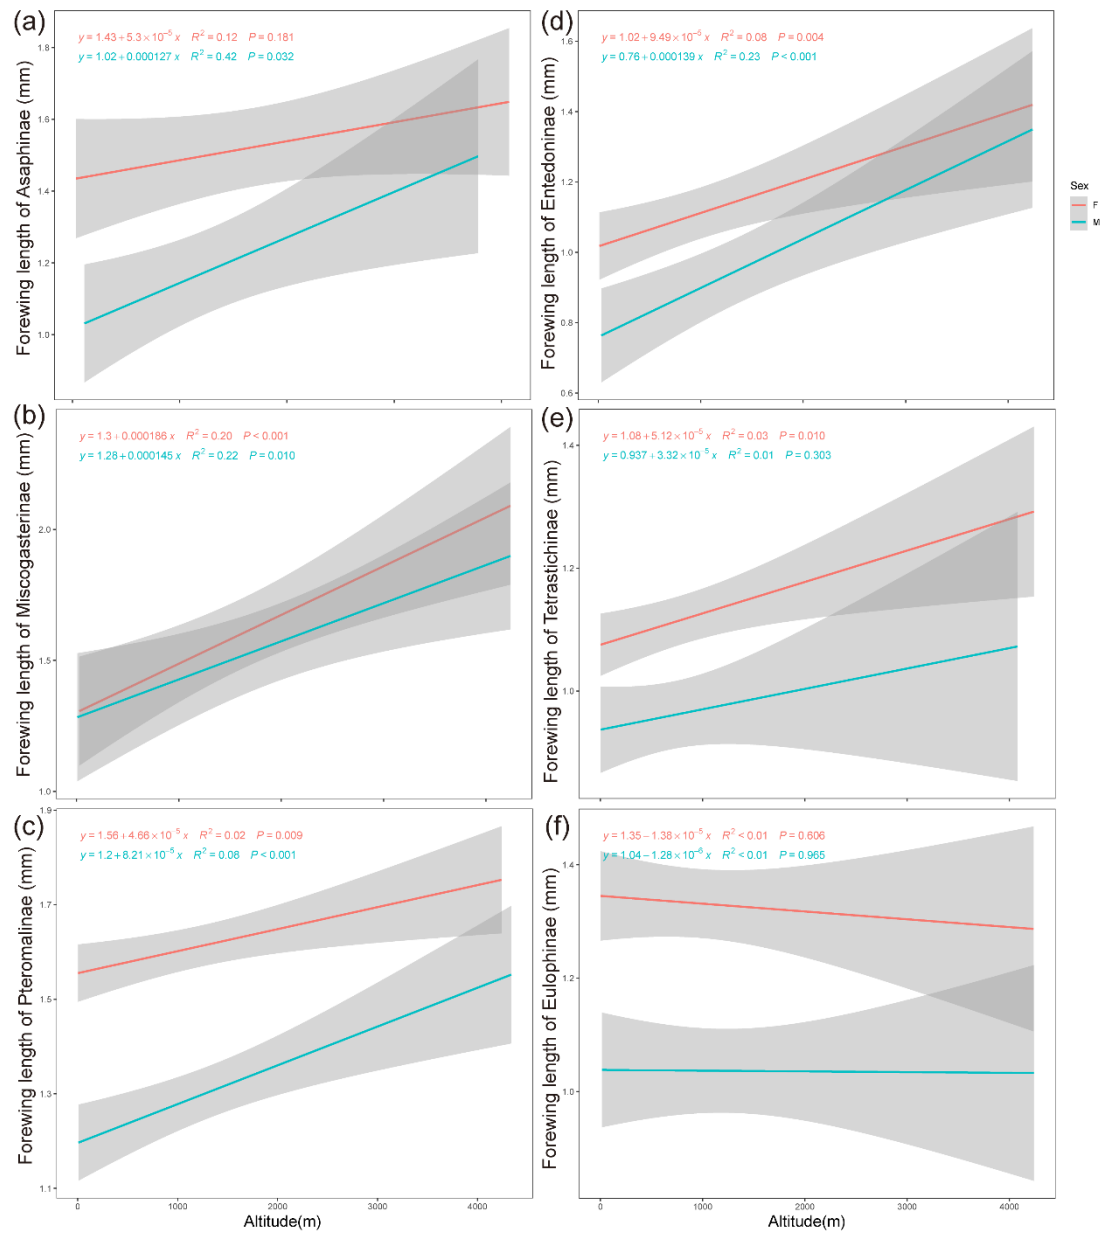

**Figure S5** The relationship between forewing length and elevation in eight genera( $n \geq 30$  and with wide altitudinal range) of Pteromalidae.

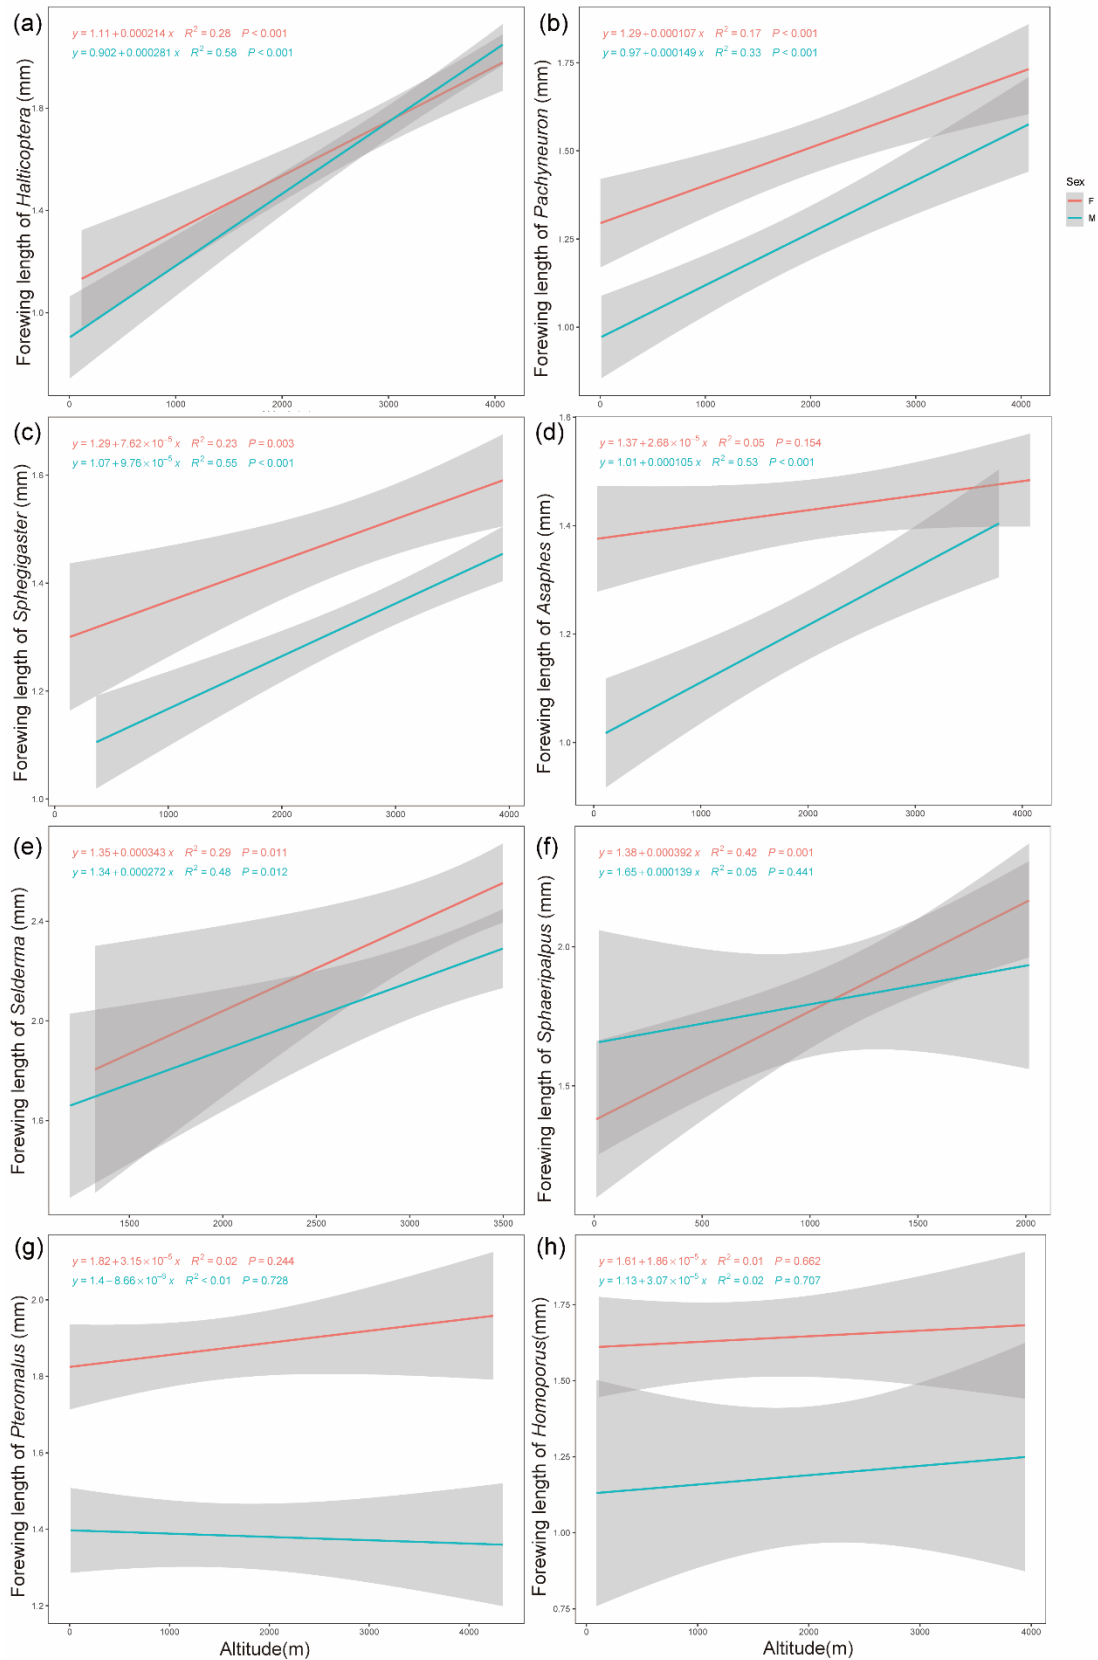

**Figure S6** The relationship between forewing length and elevation in eight genera ( $n \geq 30$  and with wide altitudinal range) of Eulophidae.

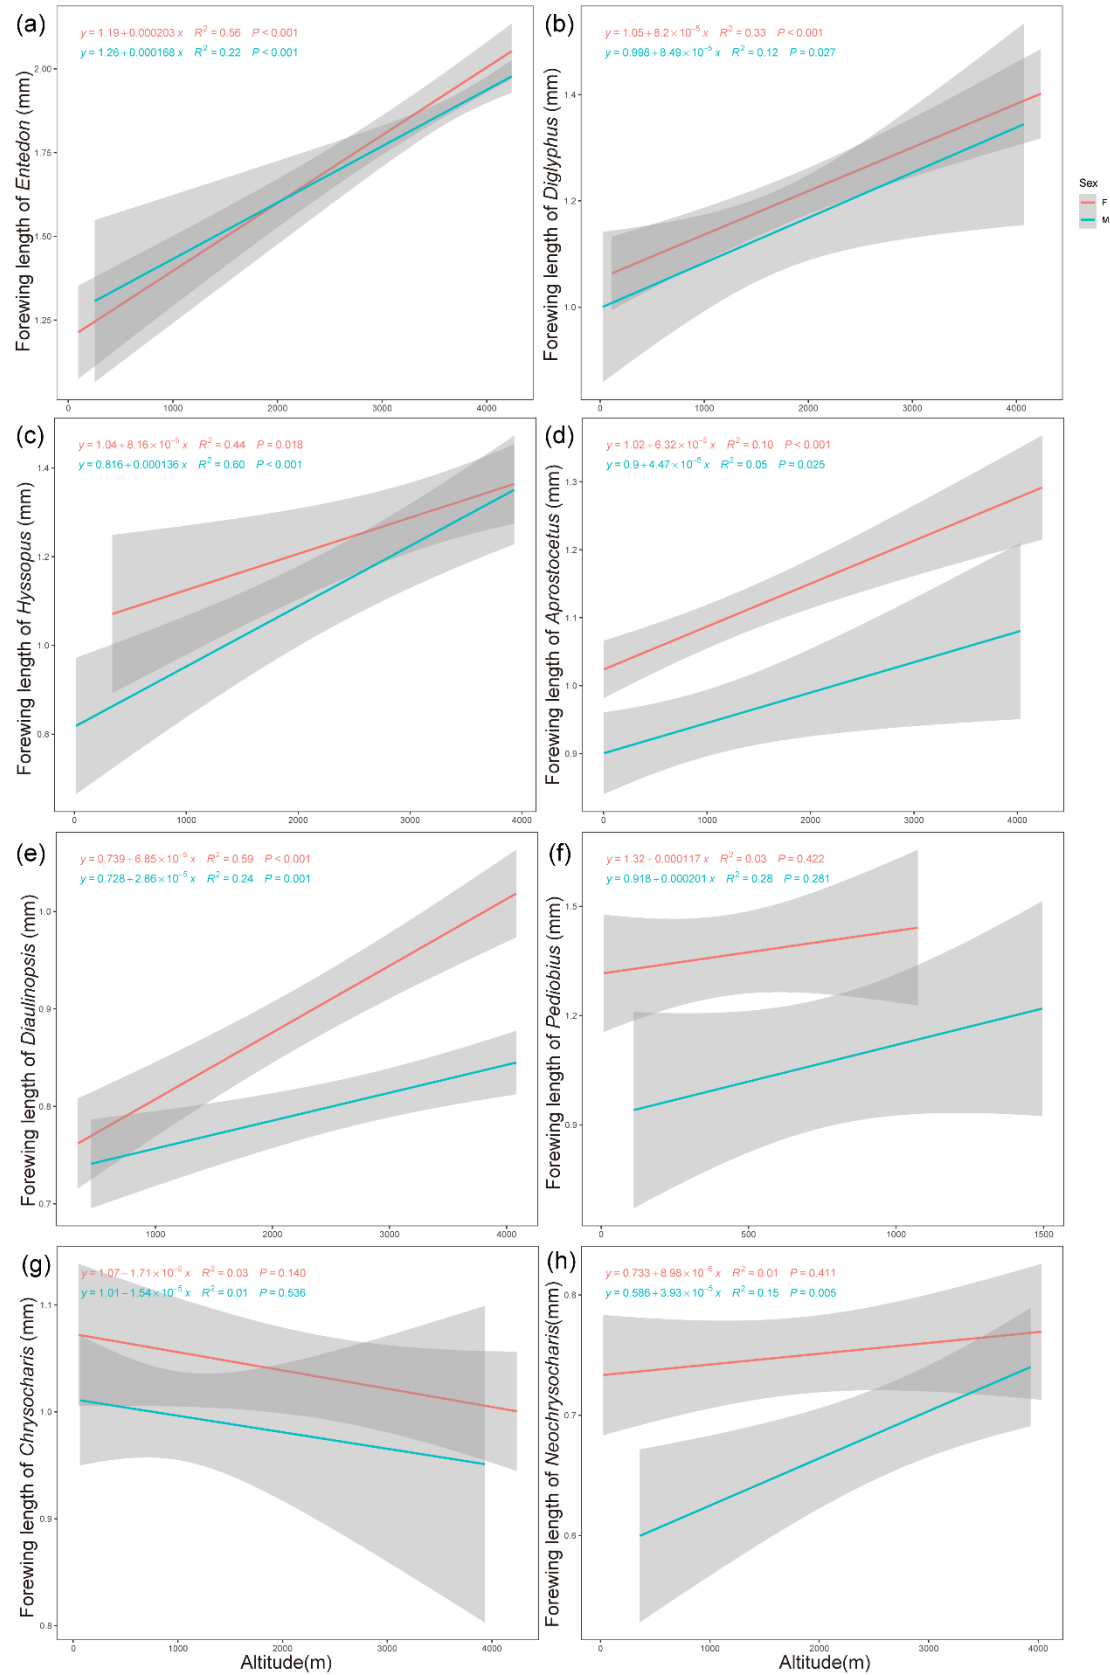

Supplement: s1 [file s1]
